# Supplementary material for: Improving Soluble Expression of SARS-CoV-2 Spike Priming Protease TMPRSS2 with an Artificial Fusing Protein
Source: MDPI journal article supplement (doi:10.3390/ijms241310475), 2023-06-22
Supplement: s1 [file s1]

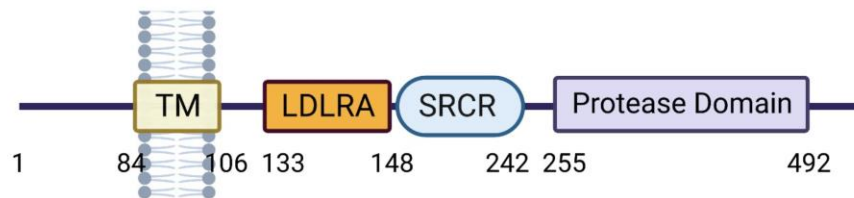

**Supplementary Figure S1.** Schematic representation of multi-domain protein TMPRSS2.TM: transmembrane domain; LDLRA: low-density lipoprotein receptor A domain; SRCR: scavenger receptor cysteine-rich domain; Protease Domain: serine protease domain.

| Plasmid          | Inserted gene   | Vector      | Selection marker | Fusion tag |
|------------------|-----------------|-------------|------------------|------------|
| pET-His-TMPRSS2  | His-TMPRSS2     | pET-28      | Kan              | None       |
| pET-MBP-TMPRSS2  | MBP-TMPRSS2     | pET-21a (+) | Amp              | MBP        |
| pET-SUMO-TMPRSS2 | SUMO-TMPRSS2    | pET-28      | Kan              | SUMO       |
| pGEX-GST-TMPRSS2 | GST-TMPRSS2     | pGEX-6P-1   | Amp              | GST        |
| pET-XXA-TMPRSS2  | His-XXA-TMPRSS2 | pET-21a (+) | Amp              | XXA-His    |

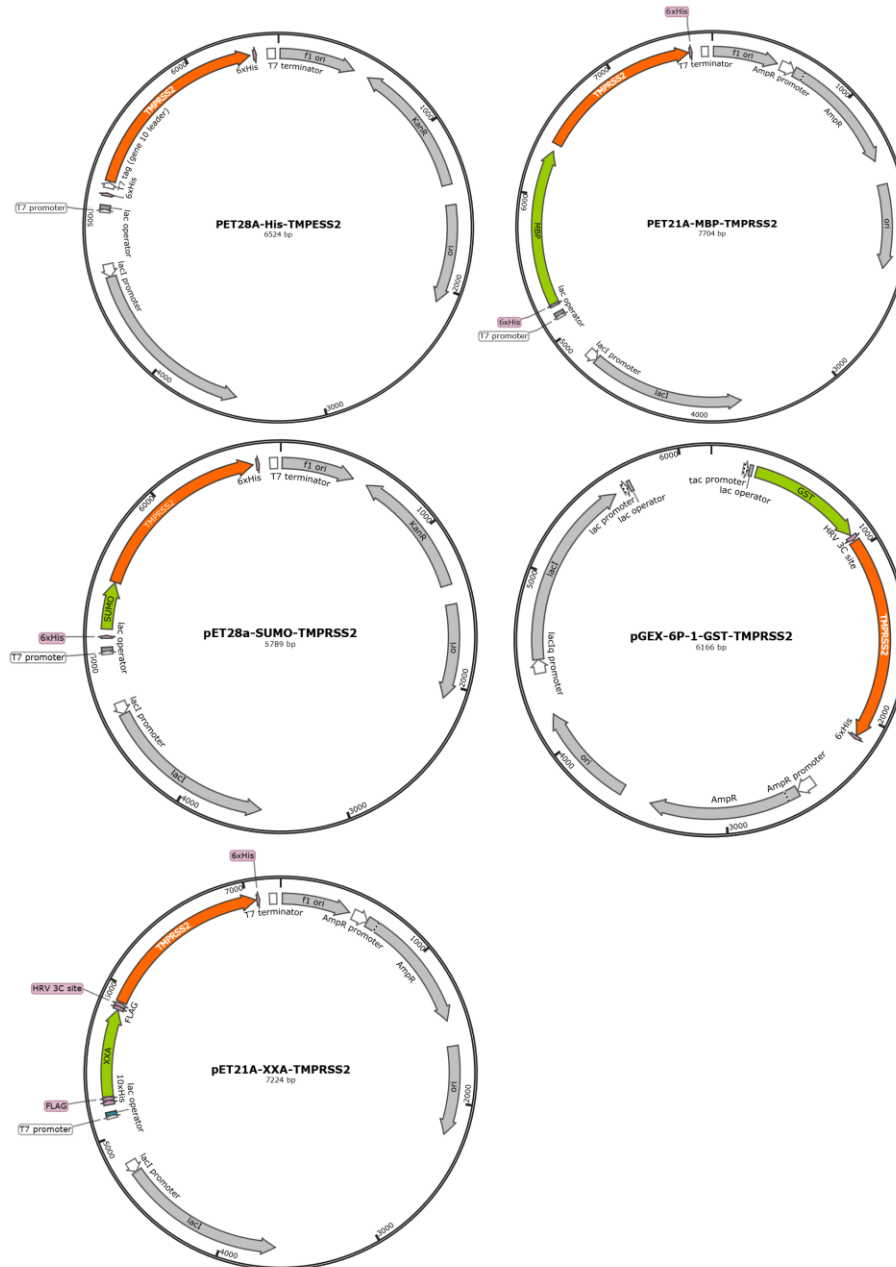

**Supplementary Figure S2.** Recombinant plasmids constructed in this study. Schematic diagram of different recombinant plasmids expressing His-TMPRSS2, MBP-TMPRSS2, SUMO-TMPRSS2, GST-TMPRSS2 and XXA-TMPRSS2.

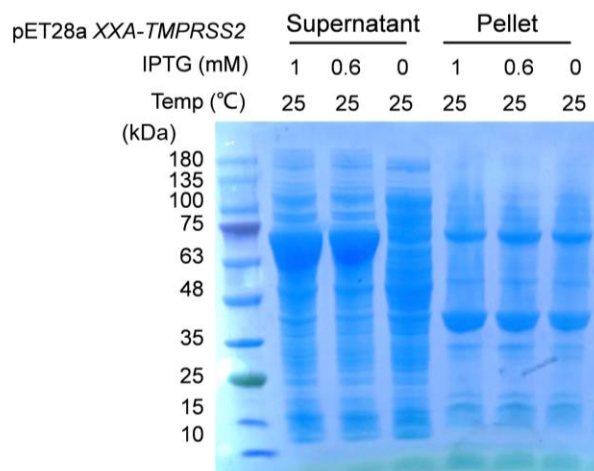

**Supplementary Figure S3.** *XXA-TMPRSS2* was induced at different condition. *E. coli* cells transfected with pET-28a-*XXA-TMPRSS2* were induced with 0.6 or 1 mM IPTG at 25 °C for 16 hours, and the soluble supernatant and insoluble pellet fractions were analyzed separately.

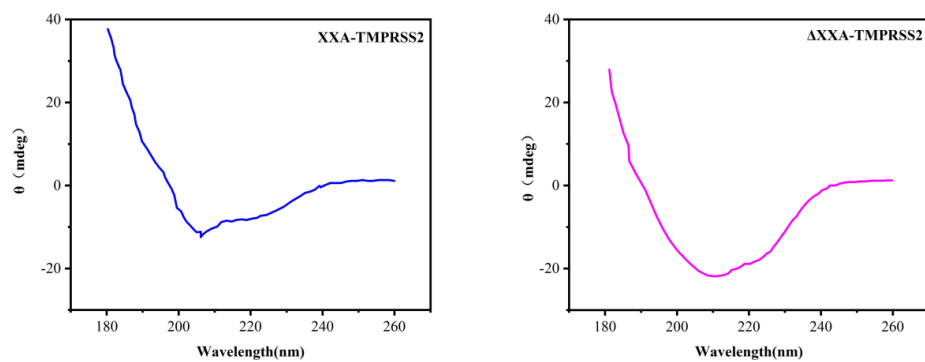

**Supplementary Figure S4.** CD spectrum of XXA-TMPRSS2 and  $\Delta$ XXA -TMPRSS. The CD spectrum of XXA-TMPRSS2 and  $\Delta$ XXA -TMPRSS protein were captured using a spectrophotometer over the entire UV wavelength range (180-260 nm) at 20 °C.

| Name | Sequence                                                                                                                                                                                            |
|------|-----------------------------------------------------------------------------------------------------------------------------------------------------------------------------------------------------|
| AXX  | MQDELADAKSAIEAKHAVSDAAKKETVTGAAADVQEARDVTQDQRQNLGYAEQK<br>AADTLGDVAAAQEAYESAKQRASEAEGAKSTASELGGAERAVRDAAGGAEGAGR<br>DAQGAAREGLKGAEGAGATDEARRHAEDVADTAKEYSELKGDAGEGLGRAQAKG<br>EDLAGDASKAAQDAADRLK   |
| XXA  | KLRDAADQAAKSADGALDEGKAQARGLGKADGKLESYKEKATDAVEAHHRAEDA<br>AEAGKLGERAAGQADRGAGEAGGAADRVAREASGGLESATSKAGEAAESARQKAE<br>YAEQAAAKDGLTAAKQEAYGLNQRQDQTVDRATEQVDAAAGTVTEKVKQAADSV<br>AHKATEIASKAKDALSEDQM |

**Supplementary Table S1.** Amino acid sequences of antifreeze protein AXX and artificial protein XXA.
